# Supplementary material
Source: PubMed Central journal article supplement (PMC6462501)

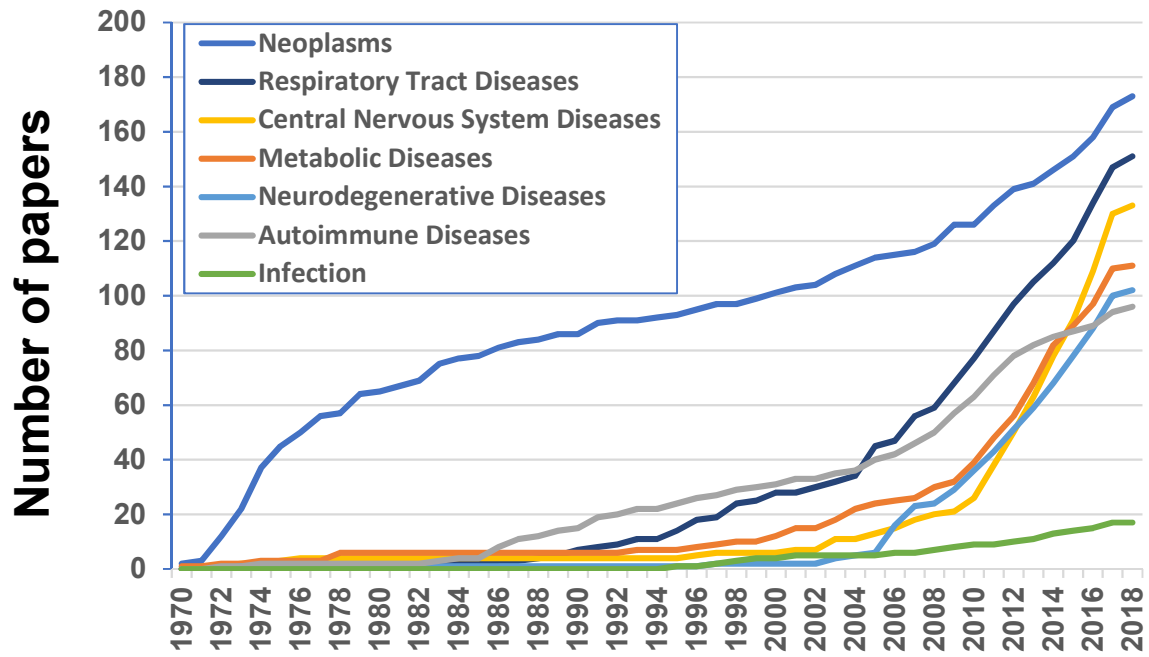

**Supple. Fig. 1**

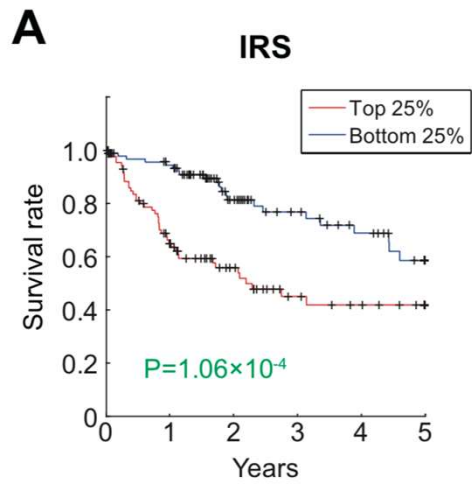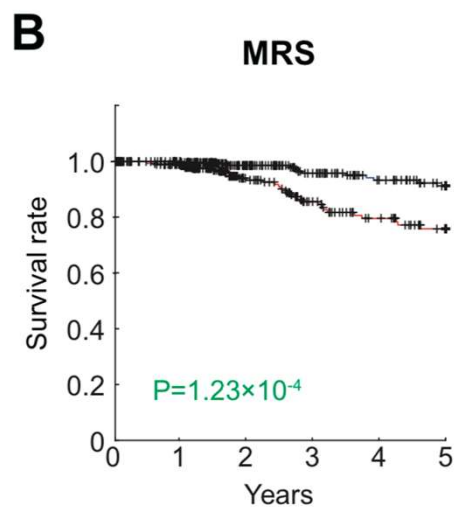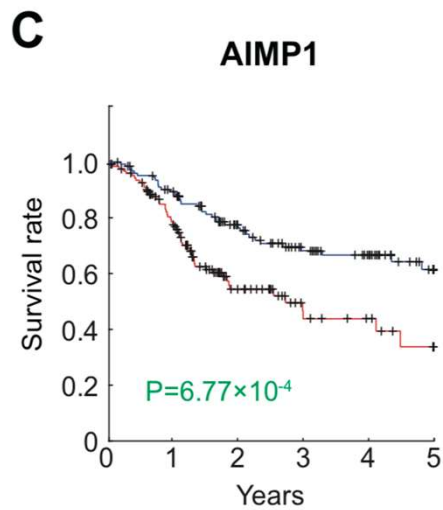

Supplement: supp_REV118.002958_136735_3_supp_287839_pn20d7.pdf [file supp_REV118.002958_136735_3_supp_287839_pn20d7.pdf]
